# Supplementary material for: Vitamins D3 and D2 have marked but different global effects on gene expression in a rat oligodendrocyte precursor cell line
Source: PubMed Central journal article supplement (PMC7146914; doi:10.1186/s10020-020-00153-7), 2020-04-09
Supplement: 10020_2020_153_MOESM5_ESM.pdf [file 10020_2020_153_MOESM5_ESM.pdf]

**Additional File 5: Supplementary Table S1. RT-qPCR validation of microarray data.**

| Gene  | Microarrays         |           |                     |           | qPCR                |                |                     |                |
|-------|---------------------|-----------|---------------------|-----------|---------------------|----------------|---------------------|----------------|
|       | D2 vs Ctrl          |           | D3 vs Ctrl          |           | D2 vs Ctrl          |                | D3 vs Ctrl          |                |
|       | Log <sub>2</sub> FC | Adj.P.Val | Log <sub>2</sub> FC | Adj.P.Val | Log <sub>2</sub> FC | <i>P</i> value | Log <sub>2</sub> FC | <i>P</i> value |
| Jag1  | -0.39               | 0.02701   | -0.50               | 7.1E-04   | -0.42               | 0.00021        | -0.56               | 0.00074        |
| Dll3  | -0.49               | 0.00055   | -0.41               | 0.00539   | -0.27               | 0.04417        | -0.22               | 0.02117        |
| Psen1 | ns                  | -         | -0.61               | 0.00068   | ns                  | -              | ns                  | -              |
| Rras2 | 0.90                | 2.2E-12   | 0.79                | 5.6E-11   | 1.89                | 0.00057        | 1.90                | 0.00536        |
| Ngf   | 0.55                | 0.00061   | 0.98                | 1.1E-08   | 2.01                | 8.5E-06        | 2.49                | 1.18E-06       |
| Tgfb2 | ns                  | -         | 0.46                | 0.02564   | ns                  | -              | 0.61                | 0.03340        |
| Sox4  | ns                  | -         | -0.38               | 0.01949   | ns                  | -              | -0.24               | 0.01877        |
| Tfeb  | ns                  | -         | -0.38               | 0.01989   | -0.16               | 0.03248        | -0.37               | 0.00144        |
| VDR   | 0.78                | 5.5E-06   | 0.69                | 0.00004   | 1.92                | 3.5E-06        | 1.88                | 1.2E-06        |

Results for nine genes are shown, comparing expression data from microarrays with respective results from qPCR at 24 h after treatment with vitamin D2 or D3. Results are expressed as log base 2 ratio vs control (Ctrl) and are the mean of quadruplicate samples. Adjusted p-values (Adj.p.val) for microarray data analysis were obtained using LIMMA and *P* values for qPCR data analysis were calculated by Student's t-test.
